# Supplementary material for: Identifying the Threshold of Iron Deficiency in the Central Nervous System of the Rat by the Auditory Brainstem Response
Source: PubMed Central journal article supplement (PMC4366421; doi:10.1177/1759091415569911), 2015-02-19
Supplement: Supplemental_Material_Table_S1.pdf [file Supplemental_Material_Table_S1.pdf]

## Online Supplemental Material

Supplemental Table S1. Composition of Harlan Teklad IS (TD.05656) and ID (TD.80396)

purified diets.

| <b>Ingredient</b>                                  | <b>Diet</b> |            |
|----------------------------------------------------|-------------|------------|
|                                                    | <b>IS</b>   | <b>IDD</b> |
|                                                    | <i>g/kg</i> |            |
| Casein, low Cu & Fe                                | 200.0       | 200.0      |
| DL-Methionine                                      | 3.0         | 3.0        |
| Sucrose                                            | 548.6       | 549.9      |
| Corn Starch                                        | 150.0       | 150.0      |
| Corn Oil                                           | 50.0        | 50.0       |
| Mineral Mix <sup>2</sup> , Fe deficient<br>(81062) | 35.0        | 35.0       |
| Vitamin Mix <sup>3</sup> , AIN-76A<br>(40077)      | 10.0        | 10.0       |
| Ferric Citrate <sup>1</sup>                        | 1.4         | -          |
| Choline Bitartate                                  | 2.0         | 2.0        |
| Ethoxyquin                                         | 0.01        | 0.01       |

<sup>1</sup> The IDD-30, IDD-20, and IDD-6 diets contained 0.154, 0.102 and 0.0 g/kg added Ferric Citrate respectively.

<sup>2</sup> Vitamin mix contained the following (g/kg mix): thiamin HCl, 0.60; riboflavin, 0.60; pyridoxine HCl, 0.70; niacin, 3.0; calcium pantothenate, 1.60; folic acid, 0.20; biotin, 0.02; vitamin B12, 1.0; dry vitamin A palmitate (500,000 U/g), 0.80; dry vitamin E acetate (500U/g), 10.0; vitamin D3 trituration (400,00U/g), 0.30; menadione sodium bisulfite, 0.20; sucrose, 981.1.

<sup>3</sup> Mineral mix contained the following (g/kg mix): CaHPO<sub>4</sub>, 500.0; NaCl, 74.0; C<sub>6</sub>H<sub>7</sub>K<sub>3</sub>O<sub>8</sub>, 220.0; K<sub>2</sub>SO<sub>4</sub>, 52.0, MgO, 24.0; MnCO<sub>3</sub>, 3.5; ZnCO<sub>3</sub>, 1.6; CuCO<sub>3</sub>, 0.3; KIO<sub>3</sub>, 0.01; Na<sub>2</sub>SeO<sub>3</sub> · 5H<sub>2</sub>O, 0.01; KCrS<sub>2</sub>O<sub>8</sub>, 0.6; sucrose 124.0.
